# Supplementary figures and images for: A YAP/TAZ-induced feedback mechanism regulates Hippo pathway homeostasis
Source: PubMed Central journal article supplement — Genes Dev. 2015 Jun 15;29(12):1271–84. doi: 10.1101/gad.262816.115 (PMC4495398; doi:10.1101/gad.262816.115), 2015-06-15

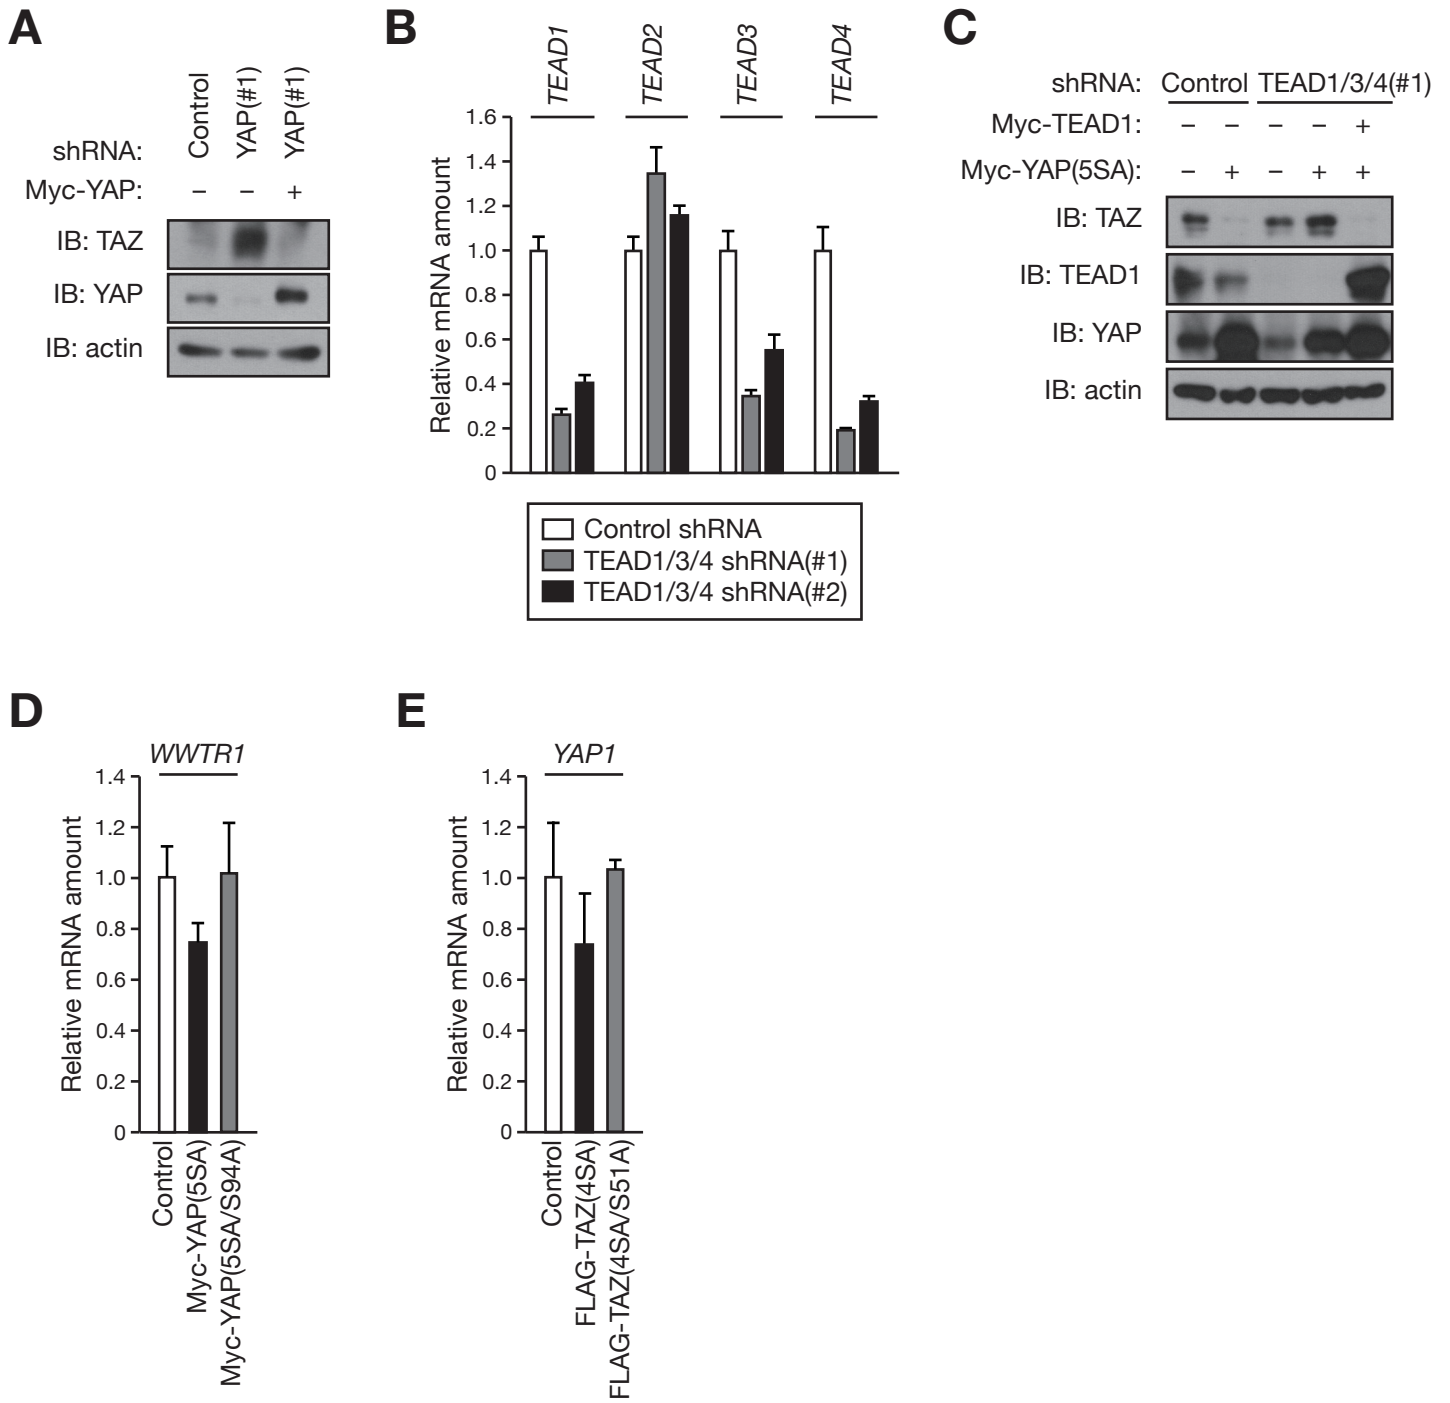

Supplement: supp_29.12.1271_FigS1.pdf [file supp_29.12.1271_FigS1.pdf]

**A**

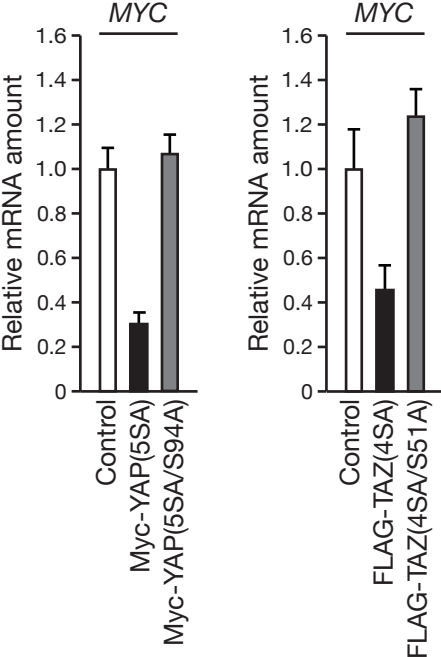

**B**

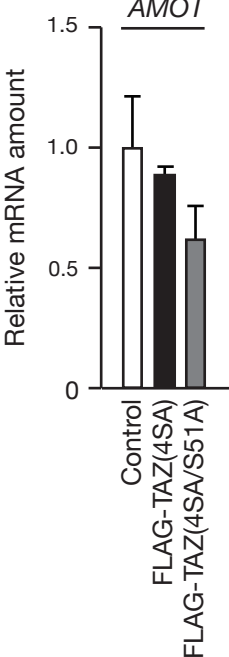

Supplement: supp_29.12.1271_FigS2.pdf [file supp_29.12.1271_FigS2.pdf]

**A**

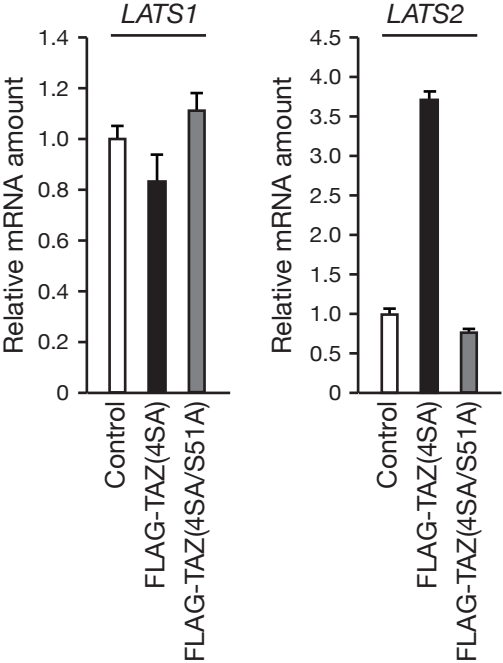

**B**

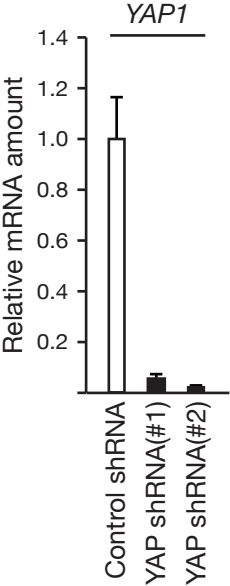

Supplement: supp_29.12.1271_FigS3.pdf [file supp_29.12.1271_FigS3.pdf]

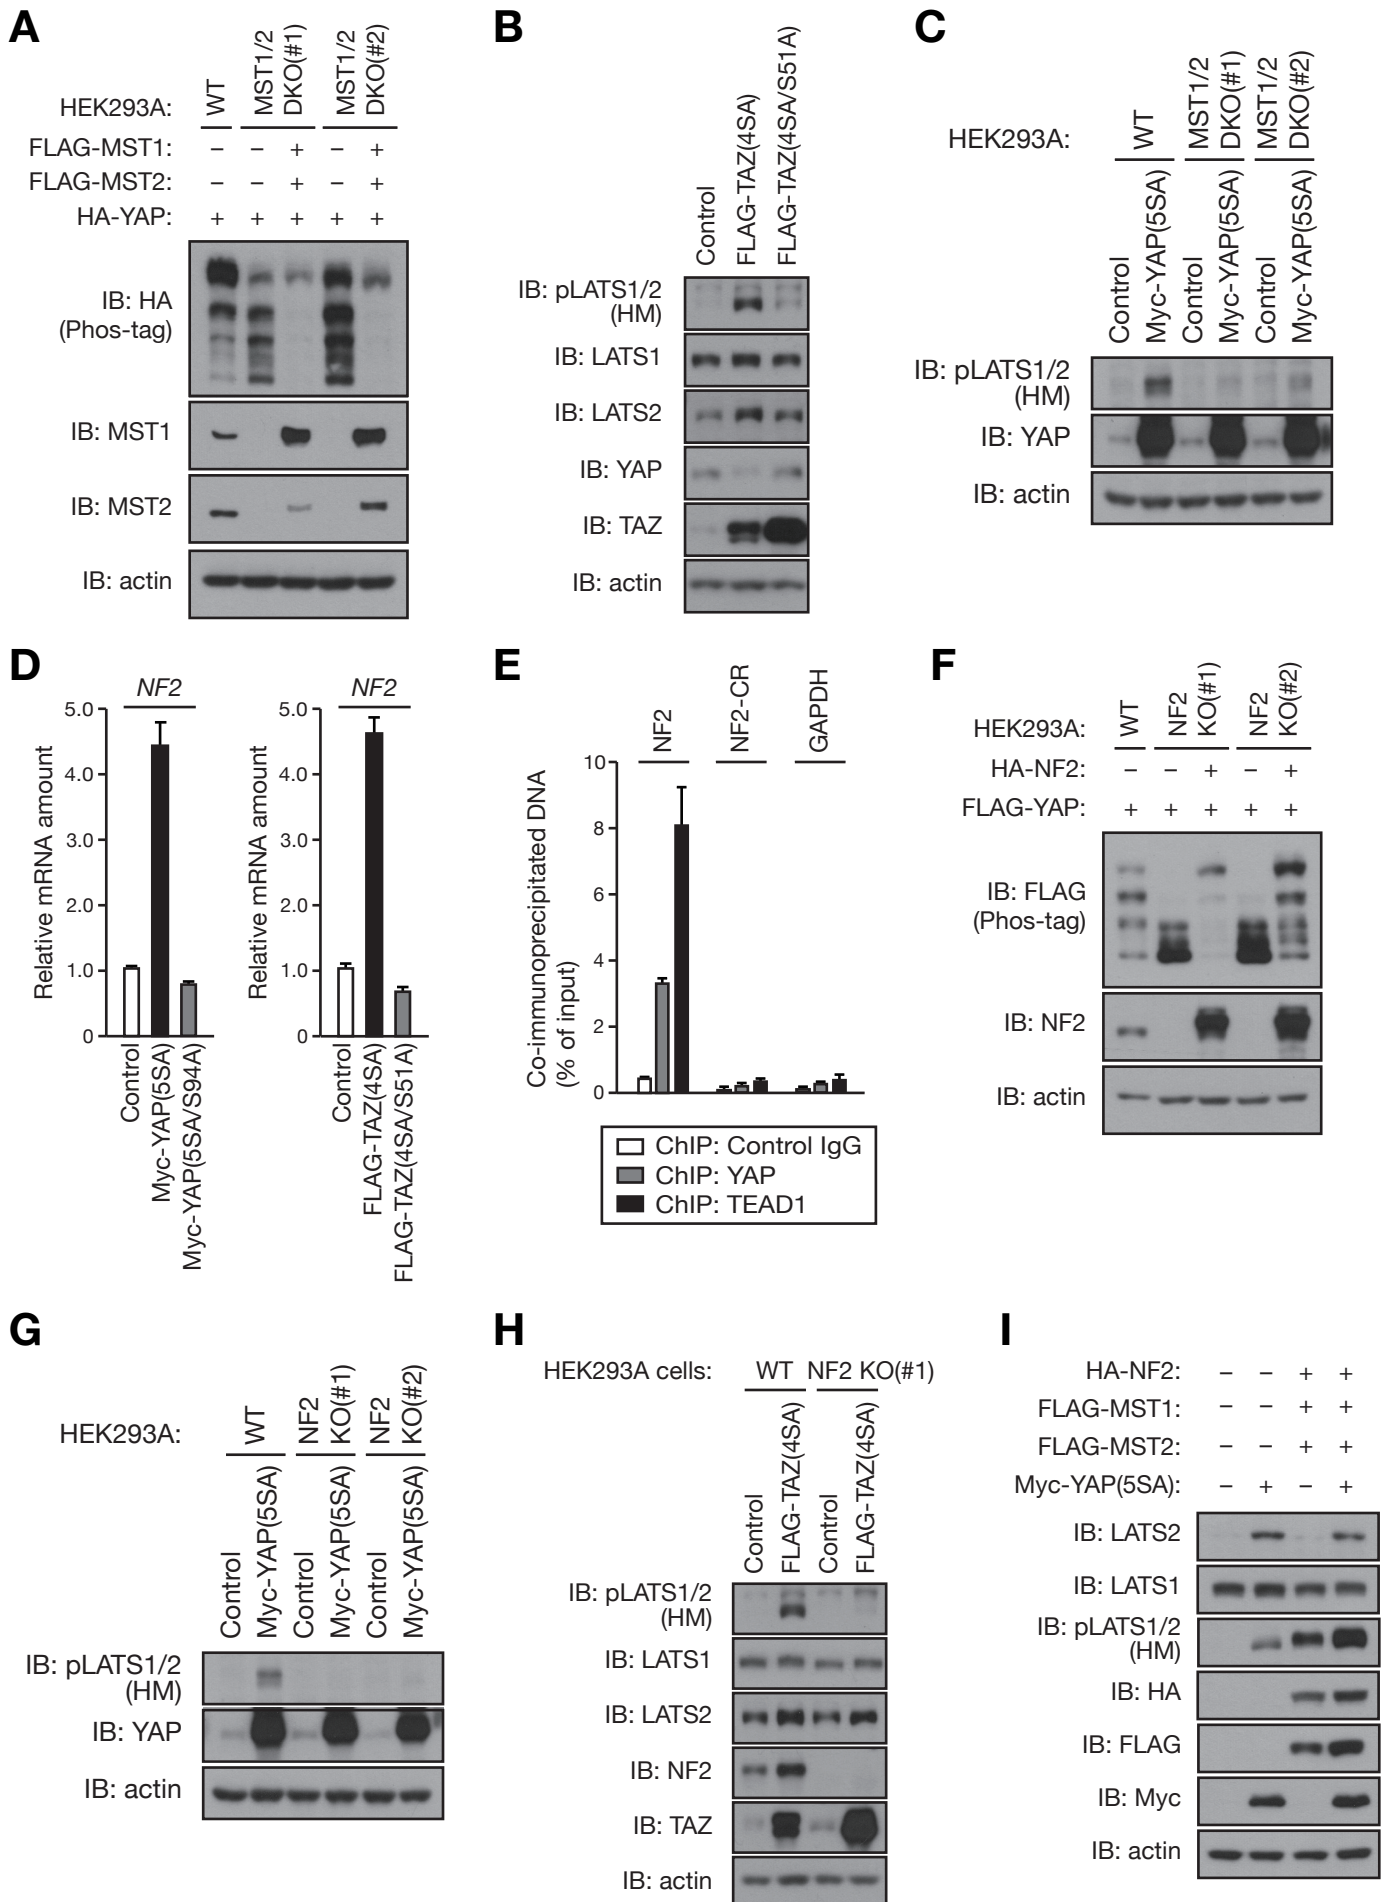

Supplement: supp_29.12.1271_FigS4.pdf [file supp_29.12.1271_FigS4.pdf]

**A**

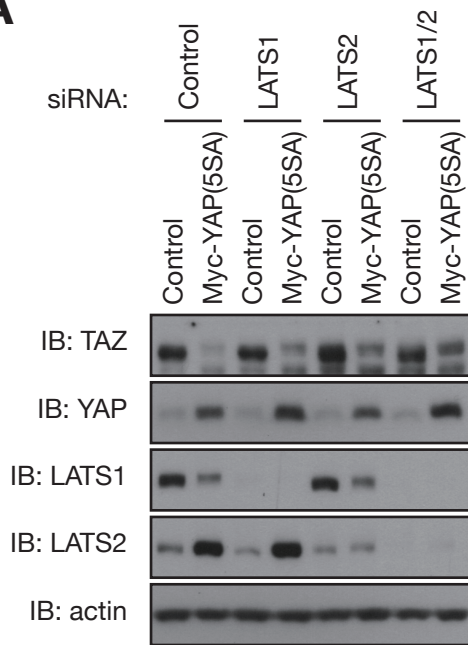

**B**

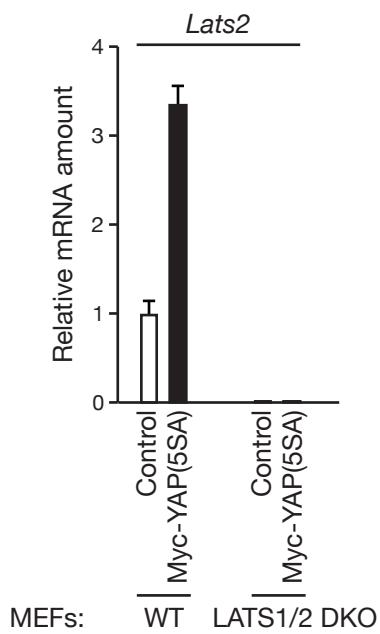

**C**

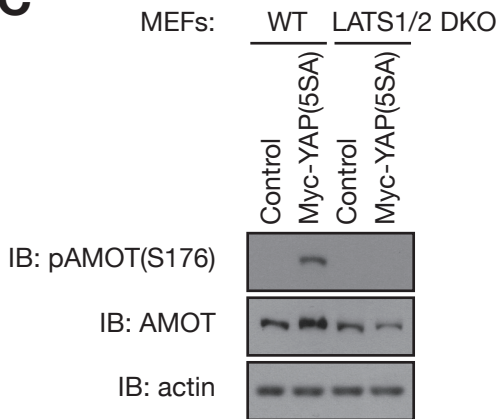

Supplement: supp_29.12.1271_FigS5.pdf [file supp_29.12.1271_FigS5.pdf]

**A**

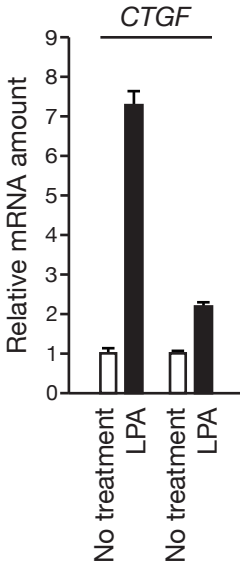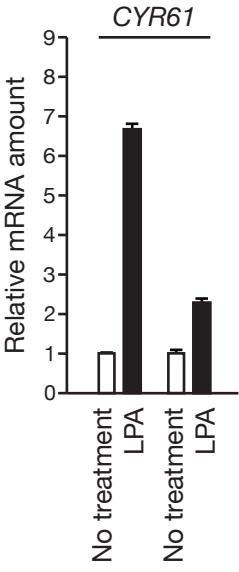

shRNA: Control TEAD1/3/4(#1)

Control TEAD1/3/4(#1)

Supplement: supp_29.12.1271_FigS6.pdf [file supp_29.12.1271_FigS6.pdf]

**A**

| HEK293A:  | LATS1/2 |     |   |
|-----------|---------|-----|---|
|           | WT      | DKO |   |
| HA-LATS1: | -       | -   | + |
| HA-LATS2: | -       | -   | + |
| FLAG-YAP: | +       | +   | + |

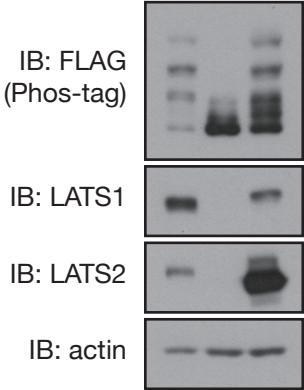

Supplement: supp_29.12.1271_FigS7.pdf [file supp_29.12.1271_FigS7.pdf]
